# Supplementary material for: Differential role of planar cell polarity gene Vangl2 in embryonic and adult mammalian kidneys
Source: PubMed Central journal article supplement (PMC7089571; doi:10.1371/journal.pone.0230586), 2020-03-23

Derish et al, Sup Figure 1:  
Loss of Vangl2 does not disturb early nephrogenesis

A

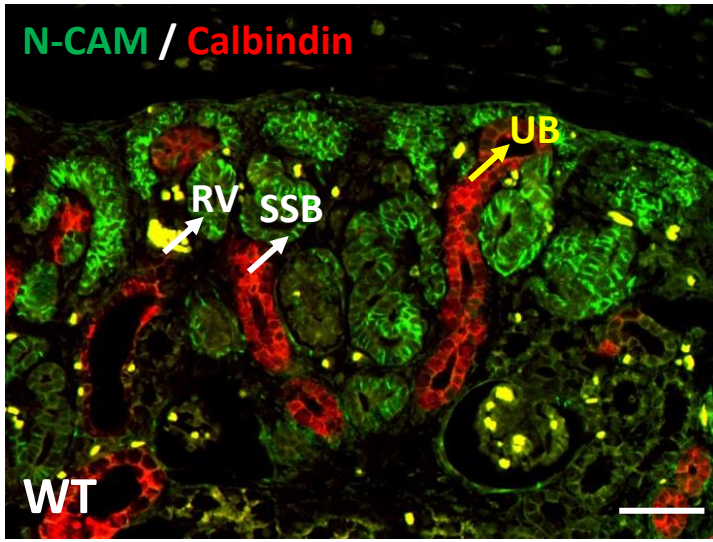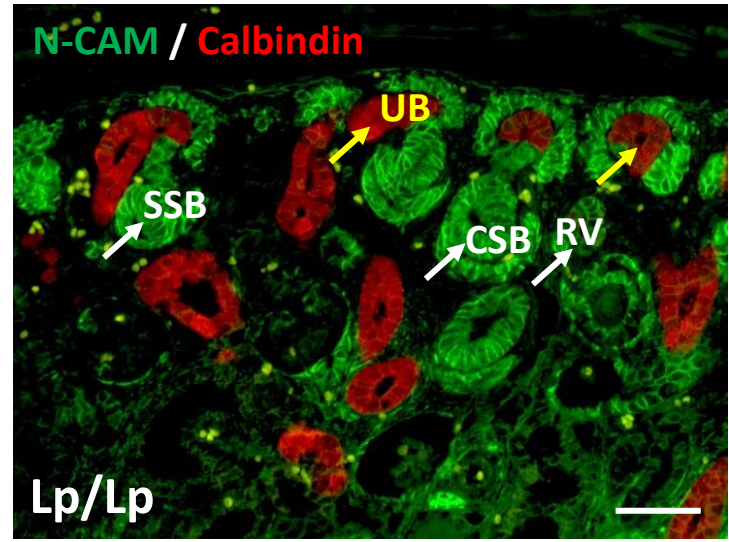

B

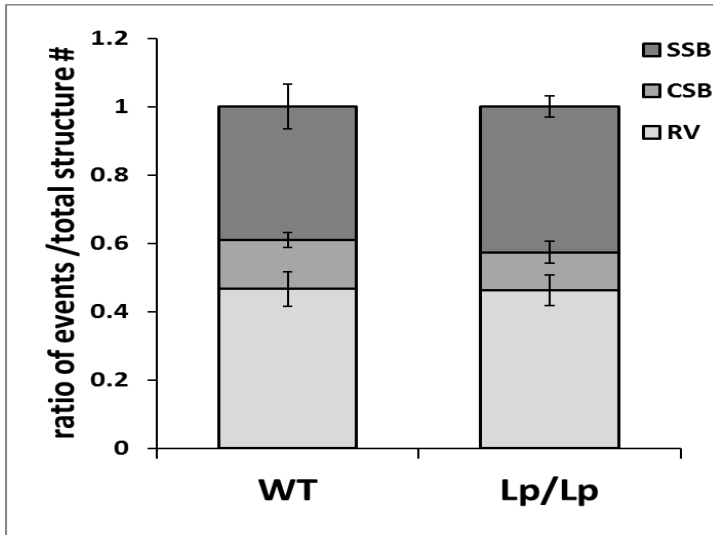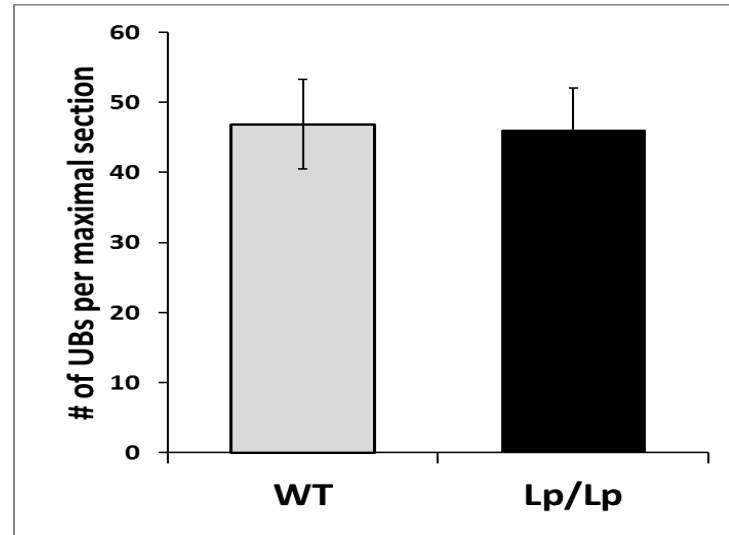

Supplement: pone.0230586.s001.pdf [file pone.0230586.s001.pdf]
