# Supplementary material for: Differential role of planar cell polarity gene Vangl2 in embryonic and adult mammalian kidneys
Source: PubMed Central journal article supplement (PMC7089571; doi:10.1371/journal.pone.0230586), 2020-03-23

Derish et al, Sup. Figure 2.

Morphological analysis of postnatal kidneys with conditional excision of Vangl2 compared to controls at postnatal days 1 and 7

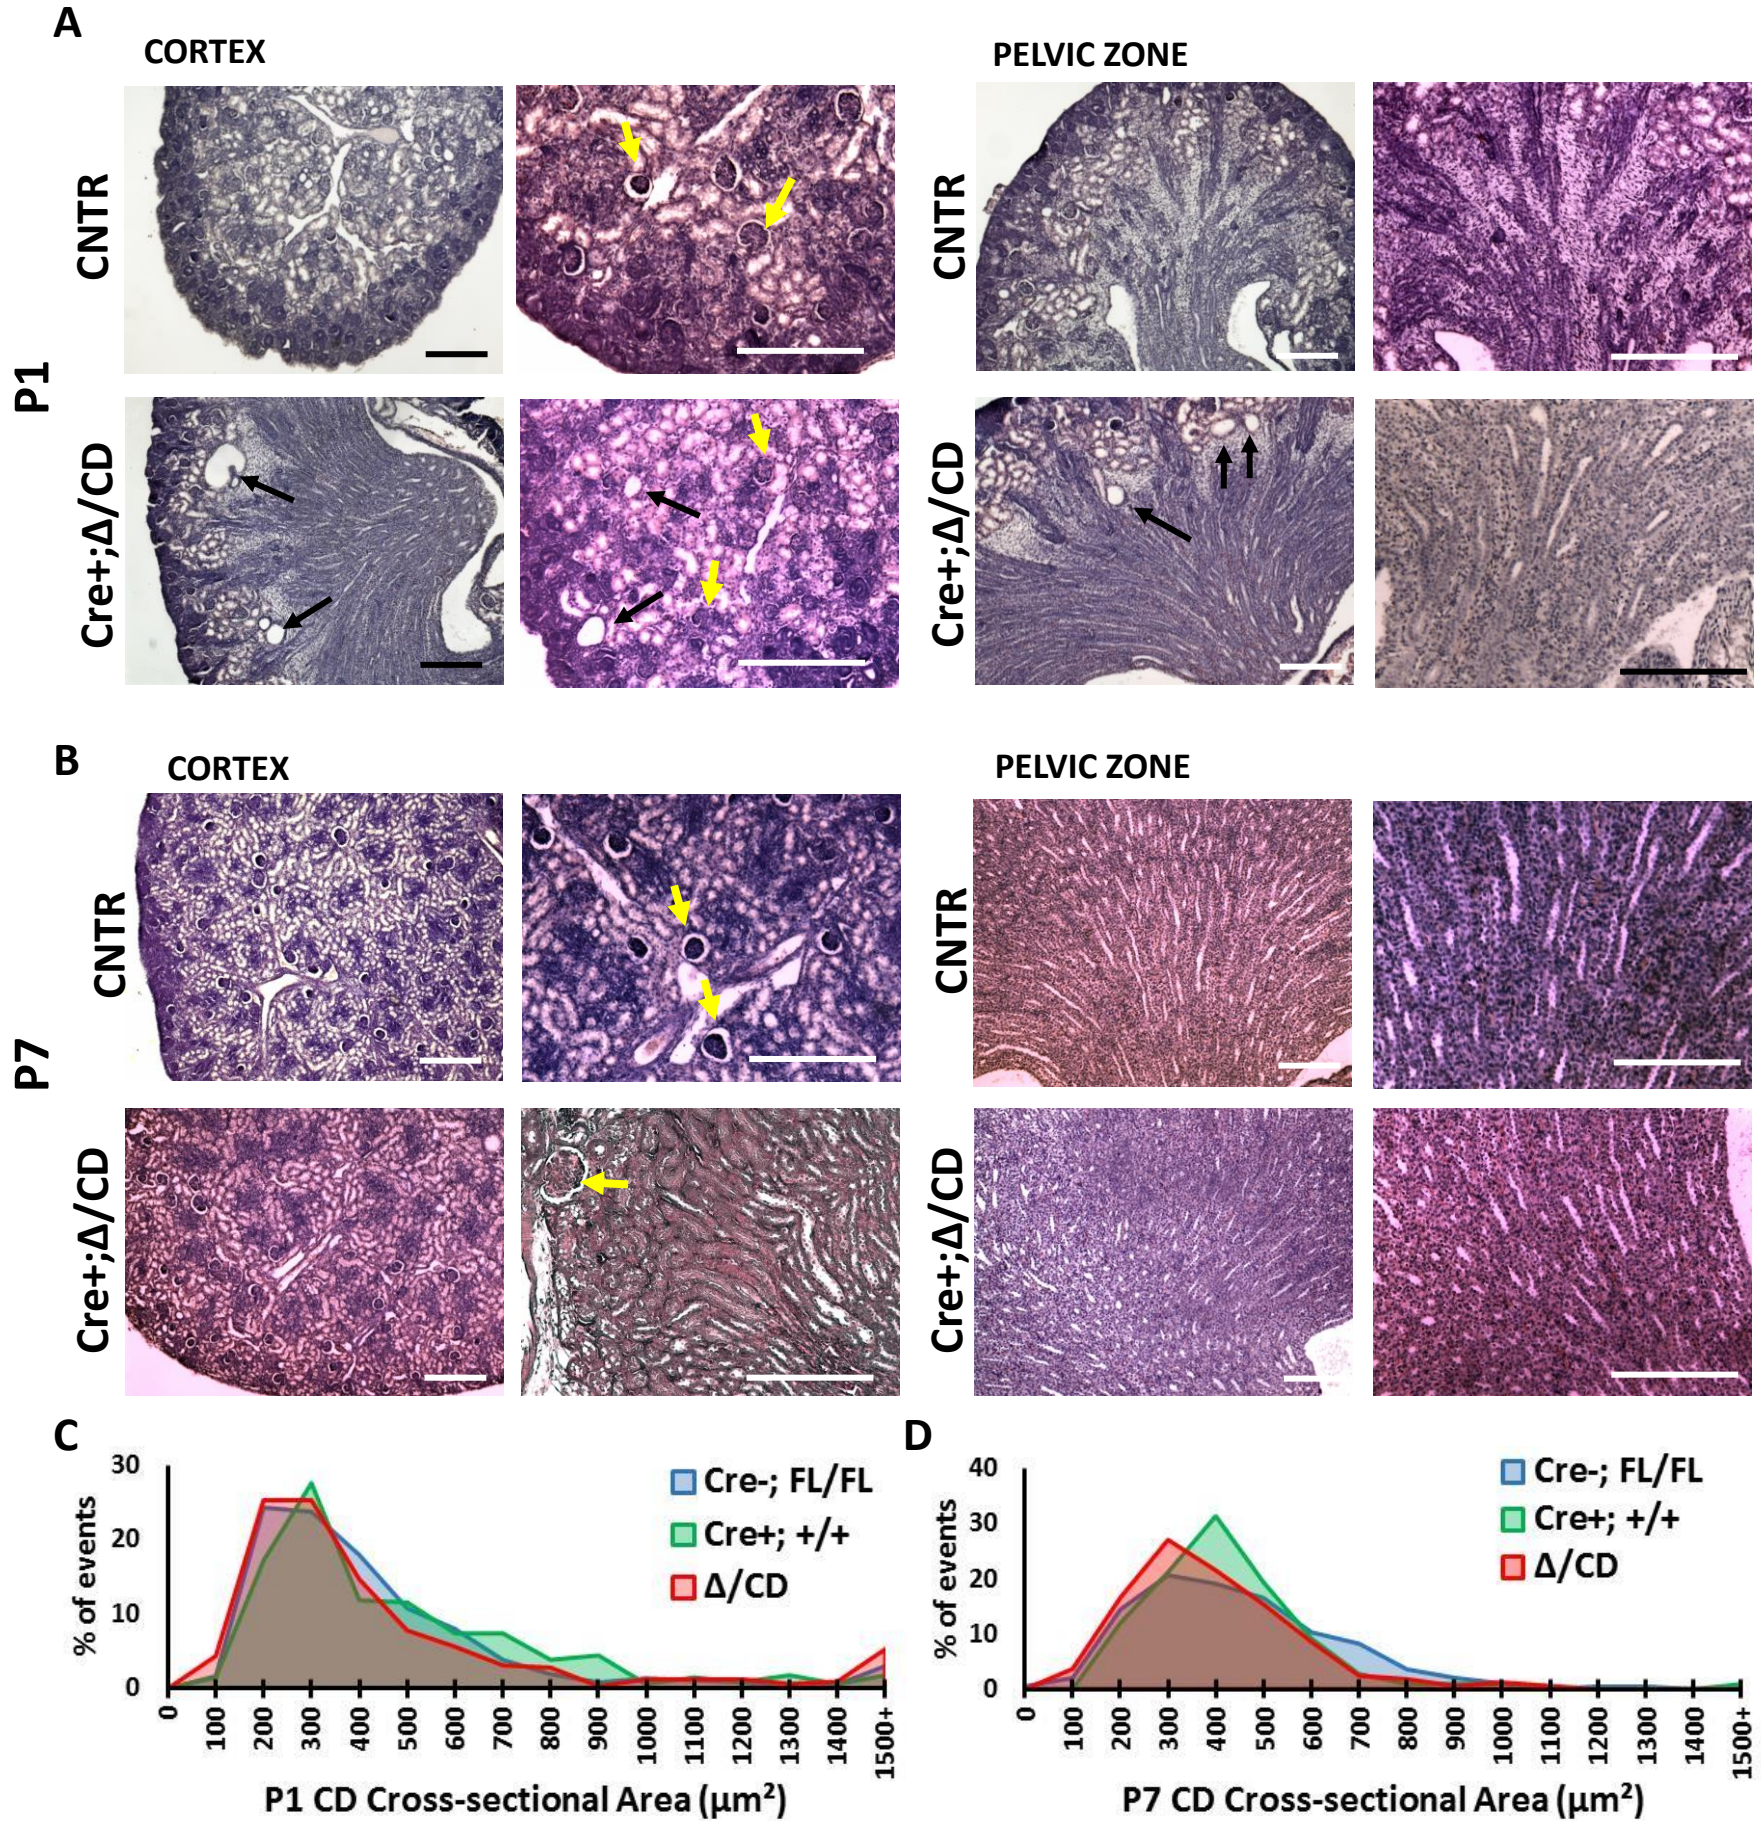

Supplement: pone.0230586.s002.pdf [file pone.0230586.s002.pdf]
