# Supplementary material for: Differential role of planar cell polarity gene Vangl2 in embryonic and adult mammalian kidneys
Source: PubMed Central journal article supplement (PMC7089571; doi:10.1371/journal.pone.0230586), 2020-03-23

Derish et al, Sup Figure 5:  
Morphological analysis of postnatal kidneys of conditional Pax2-Cre;Vangl2 mouse  
with Vangl2 excision in renal tubules.

**Pax2-Cre+;Vangl2<sup>+/LoxP</sup>**

**Pax2-Cre+;Vangl2<sup>ΔTMs/LoxP</sup>**

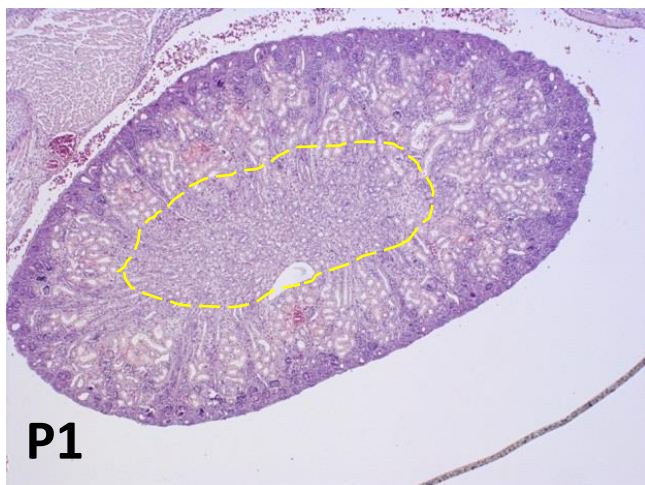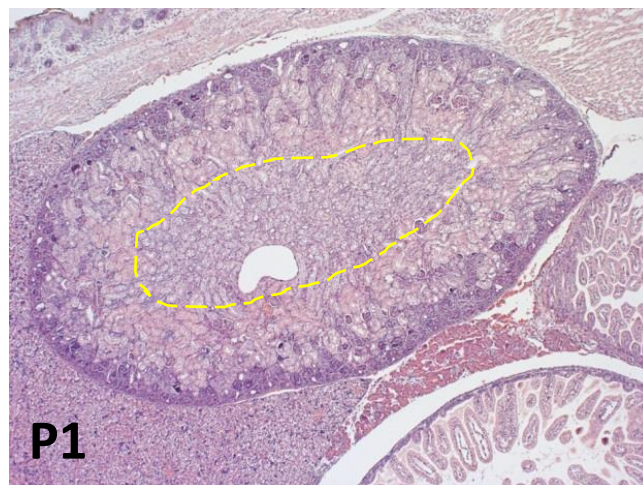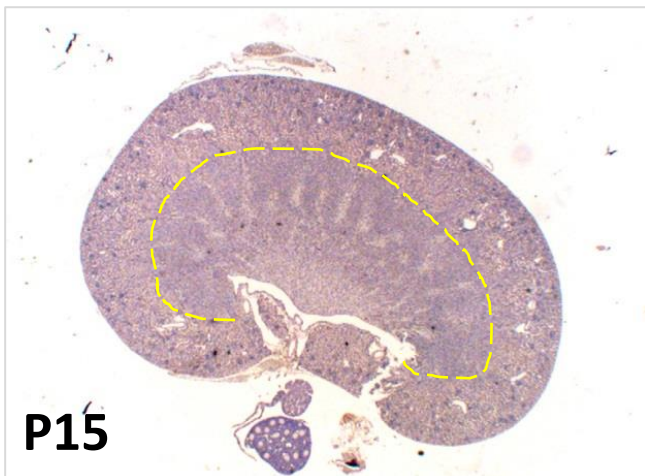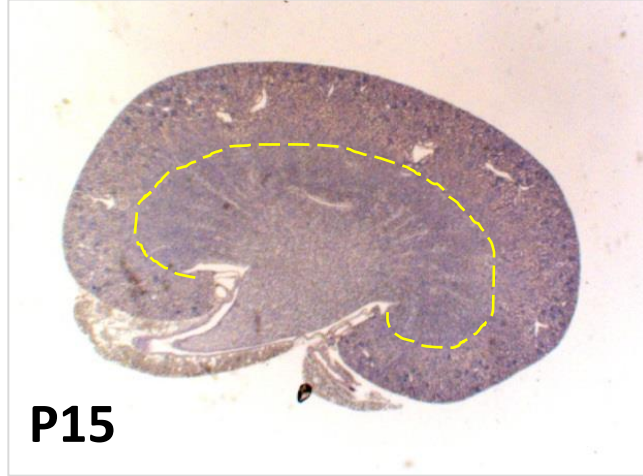

Supplement: pone.0230586.s005.pdf [file pone.0230586.s005.pdf]
