# Supplementary material for: Differential role of planar cell polarity gene Vangl2 in embryonic and adult mammalian kidneys
Source: PubMed Central journal article supplement (PMC7089571; doi:10.1371/journal.pone.0230586), 2020-03-23
Supplement: pone.0230586.s007.pdf [file pone.0230586.s007.pdf]

RAW IMAGES FOR FIG 2D

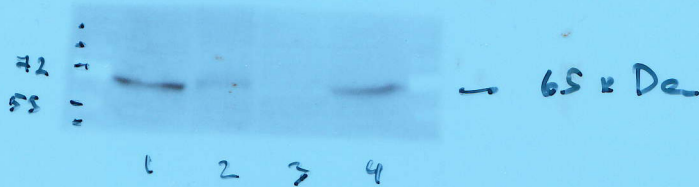

- 1- Primary CD cells Cre+; V2 (+)
- 2- Primary CD cells Cre+; V2 R/D
- 3- E17.5 Kidney Cre-; V2 D/D
- 4- E17.5 Kidney Cre-; V2 R/R

sel 9.5%

Anti-Vangl2 (rat)  
1:1000

Donkey HRP-goat 1:10000  
(in si milk buffer)

15 min (after suppl. wash).

P.S. Dilute HRP-goat in TBST)  
1:10000

13/06/19

RAW IMAGES FOR FIG 2D

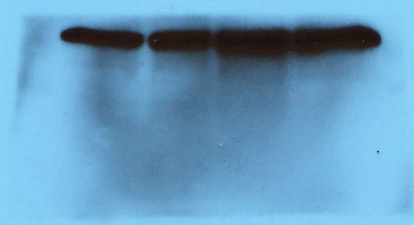

GAPDH

5 E17.5 kidney P1/P1  
2 E17.5 kidney D/D  
1 Cre<sup>+/+</sup>

1 unit

After strip
